# Supplementary material
Source: Springer Nature journal article supplement (https://www.springermedizin.de/resource/supplementary/13054_2012_612_MOESM2_ESM.pdf/9708846)

# Pareto Chart

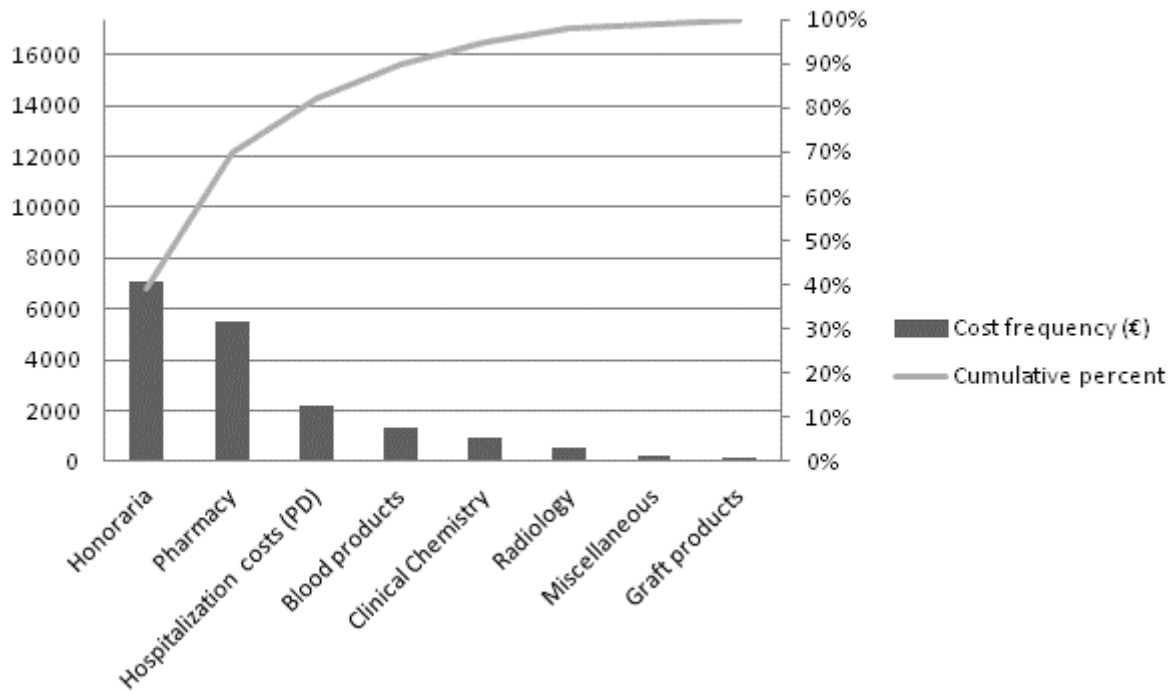

Supplement: MOESM2 [file 9708846]
